# Supplementary material for: Tuning oxygen-containing functional groups of graphene for supercapacitors with high stability
Source: Royal Society of Chemistry journal article supplement (doi:10.1039/d2na00506a), 2023-01-01
Supplement: d2na00506a1.pdf [file d2na00506a1.pdf]

## Supplementary Information

### Tuning Oxygen-Containing Functional Groups of Graphene for Supercapacitors with High Stability

Shiqi Lin <sup>a,b</sup>, Jie Tang <sup>a,b,\*</sup>, Kun Zhang <sup>a</sup>, Youhu Chen <sup>a</sup>, Runsheng Gao <sup>a</sup>, Hang Yin <sup>a</sup>, Lu-Chang Qin<sup>c</sup>

<sup>a</sup> *National Institute for Materials Science, 1-2-1 Sengen, Tsukuba, Ibaraki 305-0047, Japan*

<sup>b</sup> *University of Tsukuba, 1-1-1 Tennodai, Tsukuba, Ibaraki 305-0006, Japan*

<sup>c</sup> *Department of Physics and Astronomy, University of North Carolina at Chapel Hill,*

*Chapel Hill, NC 27599-3255, USA*

Corresponding author: Jie Tang, [tang.jie@nims.go.jp](mailto:tang.jie@nims.go.jp)

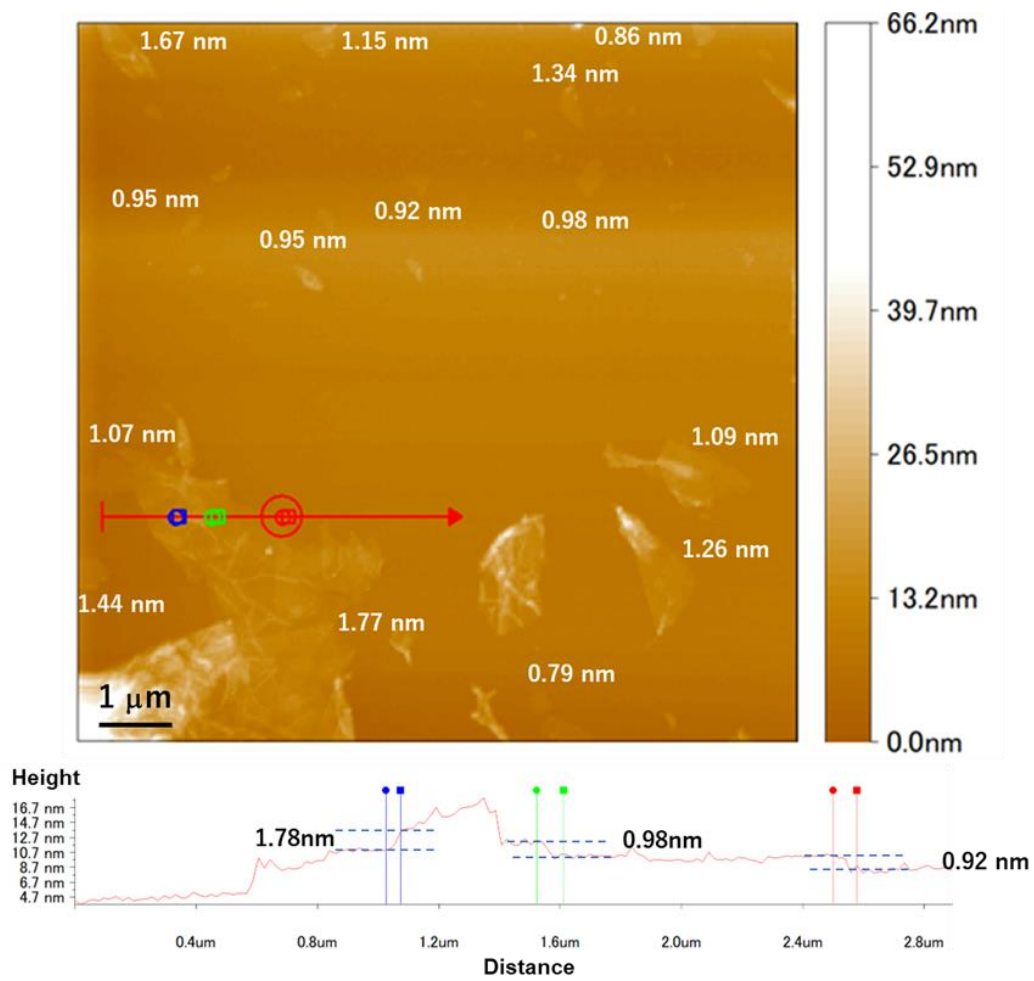

**Fig. S1.** AFM image (taken in tapping mode) of rGO-t-3 spin-coated onto Si wafer.

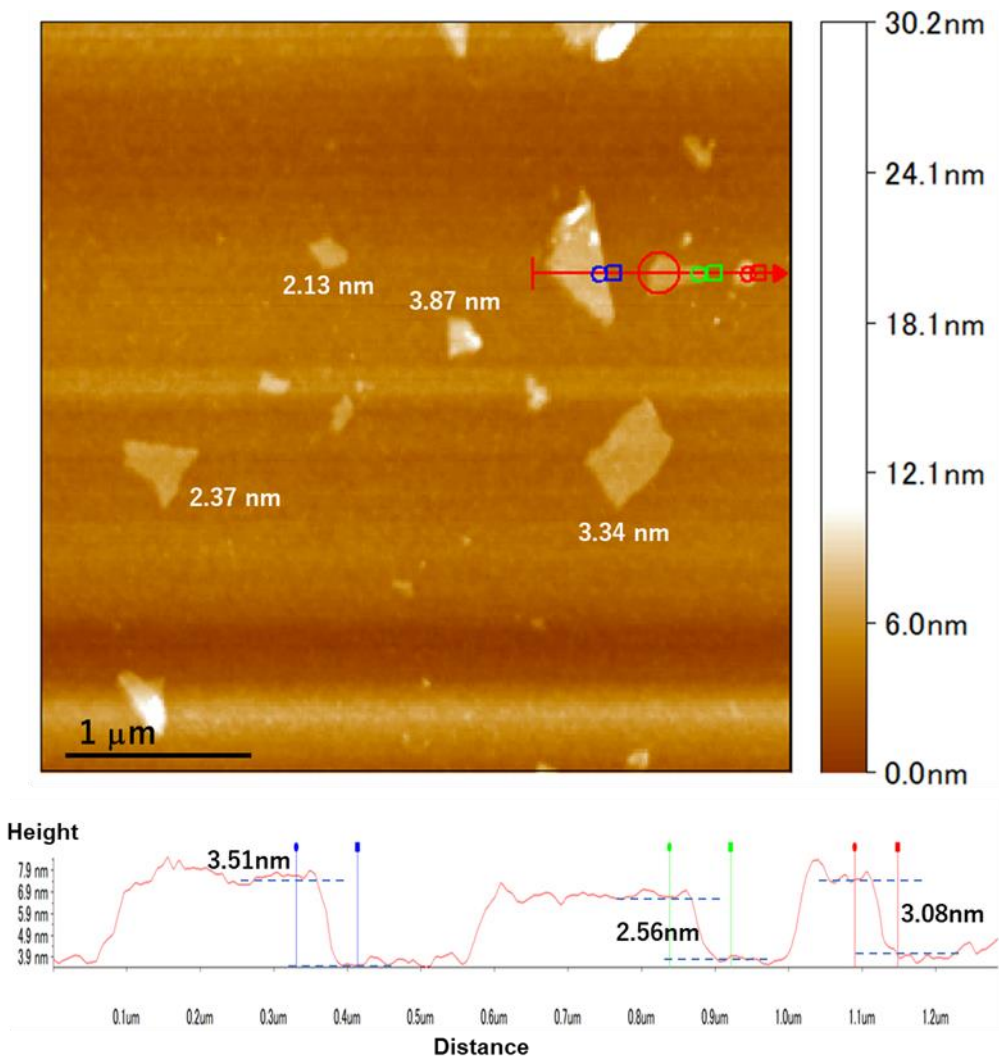

**Fig. S2.** AFM image (taken in tapping mode) of rGO-t-24 spin-coated onto Si wafer.

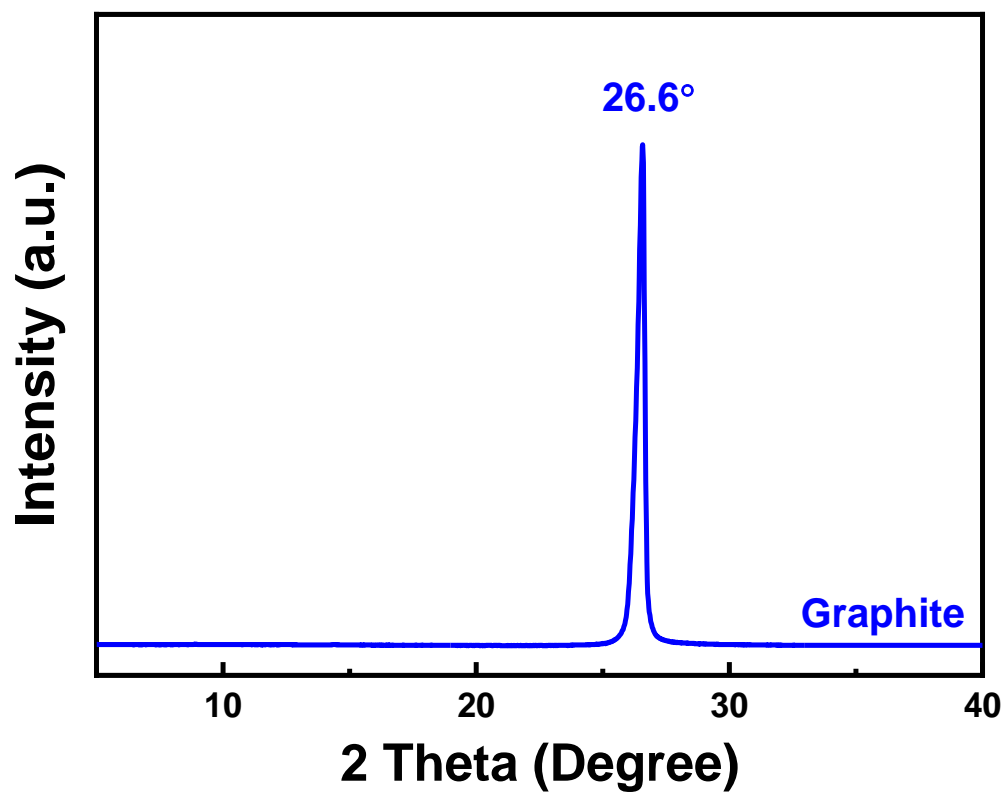

Fig. S3. XRD pattern of graphite powders.

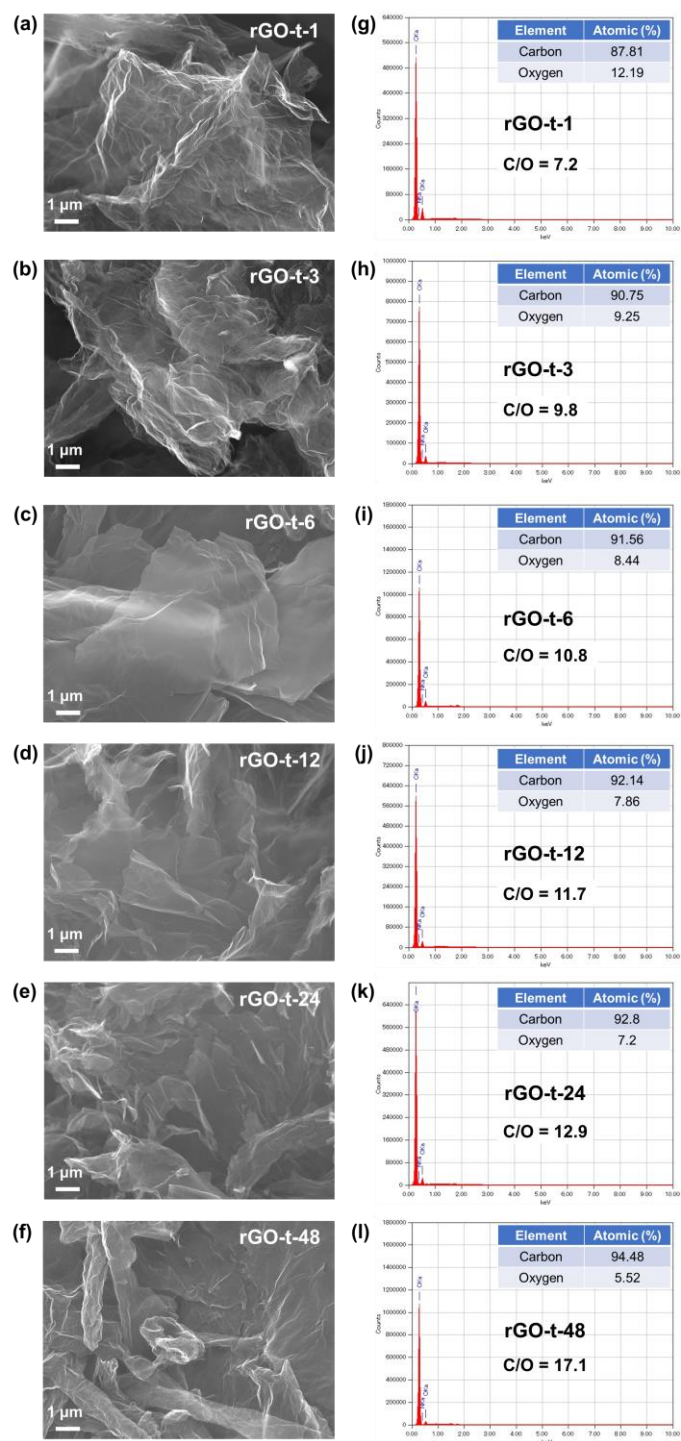

**Fig. S4.** (a-f) SEM images, (g-l) EDS measurements, and chemical compositions (inset) of rGOs.

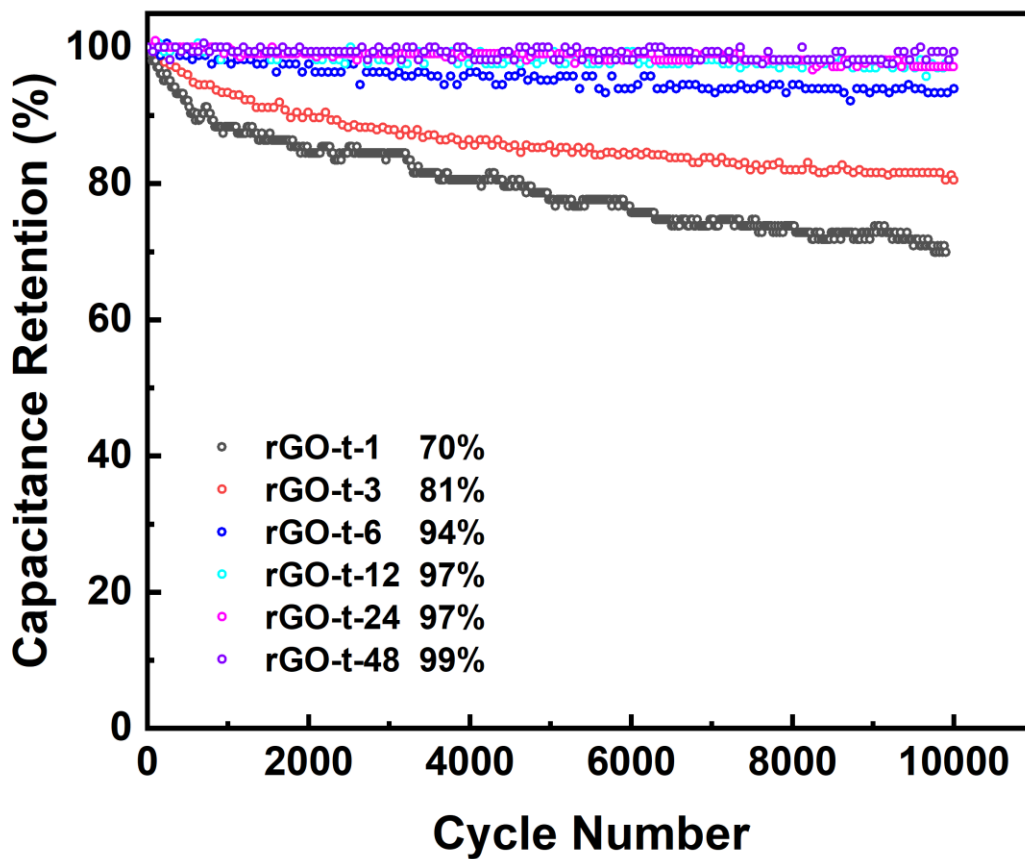

Fig. S5. Cyclic stability of supercapacitors with rGO electrodes.
